# Supplementary material
Source: PubMed Central journal article supplement (PMC4475883)
Supplement: AEM.00098-15_zam999116344so1.pdf [file AEM.00098-15_zam999116344so1.pdf]

Supplemental Material

For

Spatial, Temporal and Matrix Variability of *Clostridium botulinum* Type E Toxin Gene (*bontE*)  
Distribution at Beaches in the Great Lakes

Rasanthi U. Wijesinghe,<sup>a#</sup> Ryan J. Oster,<sup>a\*</sup> Sheridan K. Haack,<sup>a</sup> Lisa R. Fogarty,<sup>a</sup> Taaja R.  
Tucker,<sup>b</sup> and Stephen C. Riley<sup>c</sup>

17 pages

4 Figures

10 Tables

U.S. Geological Survey, Michigan Water Science Center, Lansing, MI, 48911, USA<sup>a</sup>

CSS-Dynamac, 10301 Democracy Lane, Suite 300, Fairfax, VA 22030, USA<sup>b</sup>

U.S. Geological Survey, Great Lakes Science Center, Ann Arbor, MI, 48105, USA<sup>c</sup>

Running Head: *C. botulinum* Distribution in the Great Lakes

#Address correspondence to Rasanthi U. Wijesinghe, [rwijesinghe@usgs.gov](mailto:rwijesinghe@usgs.gov)

\*Present address: Ryan Oster, Northwestern Health Science University, Bloomington, MN  
55431, USA

*Any use of trade, firm, or product names is for descriptive purposes only and does not imply endorsement by the U.S. Government.*

**TABLE S1** Catchment and watershed parameters used for correlation and discriminant analysis

| Sampling site             | Catchment<br>(ha) | Developed<br>(%) | Barren land<br>(%) | Forest &<br>Shrub (%) | Grassland<br>(%) | Agriculture<br>(%) | Wetlands<br>(%) | Population<br>in 2000 |
|---------------------------|-------------------|------------------|--------------------|-----------------------|------------------|--------------------|-----------------|-----------------------|
| Bay City State Recreation | 0.1               | 4.5              | 0.0                | 47                    | 0.0              | 36                 | 7.6             | 0                     |
| Brimley                   | 3.3               | 14               | 0.0                | 31                    | 1.0              | 4.1                | 45              | 170                   |
| Hammond                   | 2.5               | 62               | 30                 | 1.3                   | 0.0              | 0.2                | 2.3             | 206                   |
| Jeorse Park Beach         | 16                | 33               | 63                 | 0.3                   | 0.0              | 0.3                | 0.5             | 3,126                 |
| Linwood                   | 3.5               | 19               | 0.0                | 17                    | 0.3              | 1.7                | 55              | 581                   |
| Maumee                    | 44                | 25               | 1.0                | 3.6                   | 0.0              | 3.0                | 63              | 6,485                 |
| Portage Lake Front        | 12                | 58               | 1.5                | 20                    | 0.7              | 0.6                | 15              | 6,886                 |
| Deland                    | 10                | 90               | 8.6                | 0.3                   | 0.4              | 0.9                | 0.2             | 20,118                |
| Sleeping Bear             | 25                | 8.4              | 0.0                | 59                    | 2.9              | 19                 | 8.3             | 493                   |
| Waukegan                  | 10                | 57               | 9.9                | 14                    | 0.1              | 1.5                | 3.1             | 7,934                 |

**TABLE S2** Water quality data used for correlation and discriminant analysis

| NAME               | ID   | Water Temp. (°C) | Conductivity (µS) | TDS (ppm) | Salinity (ppm) | pH  | DO (ppm) | ORP (mV) | Turbidity (NTU) | NO <sub>3</sub> -N (mg/L) | PO <sub>4</sub> (mg/L) |
|--------------------|------|------------------|-------------------|-----------|----------------|-----|----------|----------|-----------------|---------------------------|------------------------|
| Bay City           | BC   | 21.5             | 378               | 266       | 202            | 8.4 | 11.4     | 220      | 61              | 0.58                      | 0.21                   |
| Brimley            | BSP  | 22.5             | 100               | 70        | 48             | 8.6 | 7.4      | 270      | 2.9             | 0.00                      | 0.00                   |
| Hammond            | HM   | 22.0             | 239               | 168       | 155            | 8.5 | 9.4      | 250      | 32              | 0.29                      | 0.10                   |
| Jeorse Park        | JP   | 24.1             | 310               | 215       | 154            | 9.0 | 7.5      | 180      | 49              | 0.00                      | 0.00                   |
| Linwood            | LW   | 23.2             | 354               | 260       | 183            | 8.3 | 7.9      | 200      | 33              | 0.49                      | 0.24                   |
| Maumee Bay         | MB   | 22.4             | 363               | 257       | 189            | 8.3 | 9.7      | 200      | 98              | 0.74                      | 0.26                   |
| Portage Lake Front | PLF  | 26.4             | 586               | 404       | 291            | 9.3 | 4.5      | 150      | 4.0             | 0.00                      | 0.05                   |
| Deland             | DL   | 19.6             | 315               | 219       | 151            | 8.5 | 8.1      | 160      | 58              | 1.66                      | 0.19                   |
| Sleeping Bear      | SLBE | 21.1             | 318               | 222       | 160            | 8.5 | 5.1      | 220      | N/A             | 0.44                      | 0.12                   |
| Waukegan           | WK   | 21.8             | 258               | 198       | 136            | 8.7 | 8.9      | 150      | 5.6             | 1.8                       | 0.22                   |

All values are average of the sampling period of May – September 2012. N/A data not available

**TABLE S3** Beach sanitary survey data used for discriminant analysis

| NAME               | ID   | <i>E. coli</i><br>summer<br>Avg. | Bird<br>seasonal<br>Avg. | Bird<br>seasonal<br>total | <i>Cladophora</i><br>onshore<br>(score) | <i>Cladophora</i><br>in water<br>(score) | <i>Chara</i><br>onshore<br>(score) | <i>Chara</i> in<br>water<br>(score) | Dead round<br>gobies<br>onshore<br>(score) | Mussel<br>shells<br>onshore<br>(score) |
|--------------------|------|----------------------------------|--------------------------|---------------------------|-----------------------------------------|------------------------------------------|------------------------------------|-------------------------------------|--------------------------------------------|----------------------------------------|
| Bay City           | BC   | 29                               | 39                       | 1982                      | 3.3                                     | 3.3                                      | 0.5                                | 1.0                                 | 0.0                                        | 2.7                                    |
| Brimley            | BSP  | 276                              | 16                       | 916                       | 0.0                                     | 0.0                                      | 0.0                                | 0.0                                 | 0.0                                        | 0.0                                    |
| Hammond            | HM   | 374                              | 18                       | 1746                      | 1.6                                     | 1.7                                      | 0.2                                | 0.5                                 | 0.0                                        | 1.4                                    |
| Jeorse Park        | JP   | 822                              | 98                       | 4322                      | 3.2                                     | 3.3                                      | 0.2                                | 0.1                                 | 0.0                                        | 0.3                                    |
| Linwood            | LW   | 84                               | 13                       | 2323                      | 2.5                                     | 1.9                                      | 0.1                                | 0.9                                 | 0.0                                        | 2.2                                    |
| Maumee Bay         | MB   | 251                              | 68                       | 3870                      | 1.7                                     | N/A                                      | 0.3                                | 0.2                                 | 0.03                                       | 2.5                                    |
| Portage Lake Front | PLF  | 37                               | 9                        | 206                       | 0.5                                     | 0.8                                      | 0.1                                | 0.1                                 | 0.0                                        | 0.0                                    |
| Deland             | DL   | 32                               | 126                      | 7455                      | 3.5                                     | 3.3                                      | 0.1                                | 0.02                                | 0.0                                        | 2.5                                    |
| Sleeping Bear      | SLBE | 15                               | 4                        | 192                       | 1.4                                     | 1.2                                      | 0.1                                | 0.03                                | 0.03                                       | 0.5                                    |
| Waukegan           | WK   | 175                              | 32                       | 7597                      | 1.3                                     | 1.8                                      | 0.2                                | 0.5                                 | 0.0                                        | 1.5                                    |

*E. coli* (CFU/100 mL), all values are average of the sampling period of May – September 2012. N/A: data not available

**TABLE S4** Meteorological data used for discriminant analysis

| NAME               | ID   | Wind speed score | Wave height score | Air Temp. (°C) | Avg. cloud Cover (%) | Dew Point (°C) | Water temp. high (°F) | Water temp. Avg. (°F) | Water temp. Low (°F) | Wind high (mph) | Wind Avg. (mph) | Rainfall Avg. (inches) |
|--------------------|------|------------------|-------------------|----------------|----------------------|----------------|-----------------------|-----------------------|----------------------|-----------------|-----------------|------------------------|
| Bay City           | BC   | 1.3              | 0.5               | 22.0           | 19                   | 16             | 74.0                  | 64.2                  | 54.7                 | 26              | 5.0             | 0.10                   |
| Brimley            | BSP  | 1.6              | 1.2               | 15.6           | 55                   | 13             | 74.0                  | 64.2                  | 54.7                 | 26              | 5.0             | 0.10                   |
| Hammond            | HM   | 1.5              | 0.9               | 19.3           | 54                   | 14             | 60.0                  | 53.2                  | 46.1                 | 21              | 6.0             | 0.04                   |
| Jeorse Park        | JP   | 1.4              | 0.9               | 23.0           | 46                   | 17             | 84.0                  | 74.6                  | 65.1                 | 14              | 7.6             | 0.11                   |
| Linwood            | LW   | 1.4              | 0.5               | 18.4           | 27                   | 13             | 68.9                  | 59.6                  | 50.5                 | 10              | 4.0             | 0.07                   |
| Maumee Bay         | MB   | 1.6              | 0.8               | 24.2           | 14                   | 18             | 84.5                  | 72.6                  | 60.2                 | 17              | 5.9             | 0.12                   |
| Portage Lake Front | PLF  | 1.0              | 1.0               | 23.1           | 35                   | 18             | 84.3                  | 75.1                  | 65.6                 | 14              | 7.5             | 0.11                   |
| Deland             | DL   | 1.6              | 1.0               | 20.9           | 23                   | 16             | 69.2                  | 60.5                  | 52.3                 | 9               | 1.7             | 0.31                   |
| Sleeping Bear      | SLBE | 1.0              | 1.0               | 20.3           | 28                   | 16             | 80.1                  | 70.0                  | 59.9                 | 13              | 4.3             | 0.06                   |
| Waukegan           | WK   | 1.0              | 1.0               | 20.7           | 4                    | 15             | 68.9                  | 62.5                  | 56.3                 | 19              | 11              | 0.12                   |

All values are average of the sampling period of May – September 2012.

**TABLE S5** Hydrological data used for discriminant analysis

| NAME               | ID   | Wave height score | Surface Magnitude of velocity (m/s) | Magnitude Velocity depth Avg. (m/s) | Air Magnitude depth of velocity (m/s) |
|--------------------|------|-------------------|-------------------------------------|-------------------------------------|---------------------------------------|
| Bay City           | BC   | 0.5               | 0.03                                | 0.02                                | 5.5                                   |
| Brimley            | BSP  | 1.2               | N/A                                 | 0.07                                | 5.0                                   |
| Hammond            | HM   | 0.9               | 0.04                                | 0.03                                | 5.8                                   |
| Jeorse Park        | JP   | 0.9               | 0.04                                | 0.02                                | 5.6                                   |
| Linwood            | LW   | 0.4               | 0.07                                | 0.05                                | 6.5                                   |
| Maumee Bay         | MB   | 0.8               | N/A                                 | 0.02                                | 4.7                                   |
| Portage Lake Front | PLF  | 1.0               | 0.04                                | 0.02                                | 5.9                                   |
| Deland             | DL   | 1.1               | 0.08                                | 0.04                                | 4.9                                   |
| Sleeping Bear      | SLBE | 1.0               | 0.04                                | 0.01                                | 4.9                                   |
| Waukegan           | WK   | 1.0               | 0.17                                | 0.11                                | 7.3                                   |

All values are average of the sampling period of May – September 2012. N/A: data not available

**TABLE S6** Some quality control parameters of the qPCR standard curve

| Parameters     | Individual standard curve (range) | Compiled standard curve | Acceptable standard curve criteria |
|----------------|-----------------------------------|-------------------------|------------------------------------|
| Efficiency     | 89.5 -101.7                       | 98.2                    | 90-110%                            |
| R <sup>2</sup> | 0.98 – 1.00                       | 0.995                   | > 0.99                             |
| Slope          | 3.28 - 3.60                       | 3.356                   | 3.10 -3.58                         |
| LOD            | 3 gene copies                     | 3 gene copies           |                                    |
| LOQ            | 10 gene copies                    | 10 gene copies          |                                    |

R<sup>2</sup>: Correlation determination between gene copy numbers and No. of amplification cycles

**TABLE S7** Hydrological, environmental and beach characteristics used in data analysis

| Parameter                                      | Categorical data | Numerical data | Data source           |
|------------------------------------------------|------------------|----------------|-----------------------|
| <b>Beach Sources and conditions</b>            |                  |                |                       |
| <i>Cladophora</i> onshore                      | yes              |                | AMBLE survey          |
| <i>Cladophora</i> in water                     | yes              |                | AMBLE survey          |
| <i>Chara</i> onshore                           | yes              |                | AMBLE survey          |
| <i>Chara</i> in water                          | yes              |                | AMBLE survey          |
| Dead round gobies onshore                      | yes              |                | AMBLE survey          |
| Mussel shells onshore                          | yes              |                | AMBLE survey          |
| Cloud cover on day of sampling                 | yes              |                | AMBLE survey          |
| Water temperature on day of sampling (°F)      |                  | yes            | Beach sanitary survey |
| Air temperature on day of sampling (°C)        |                  | yes            | AMBLE survey          |
| pH                                             |                  | yes            | Beach sanitary survey |
| Turbidity (NTU)                                |                  | yes            | Beach sanitary survey |
| Conductivity (µS)                              |                  | yes            | Beach sanitary survey |
| Oxidation reduction potential (mV)             |                  | yes            | Beach sanitary survey |
| <b>Catchment and watershed characteristics</b> |                  |                |                       |
| Population in catchment and watershed          |                  | yes            | U. S. Census, 2010    |
| Watershed area (Ha)                            |                  | yes            | Fry et al., 2011      |
| Open water (%)                                 |                  | yes            | Fry et al., 2011      |
| <b>Land cover (%)</b>                          |                  |                |                       |
| Developed                                      |                  | yes            | Fry et al., 2011      |
| Barren land: rock, sand, clay                  |                  | yes            | Fry et al., 2011      |
| Forest and shrubs                              |                  | yes            | Fry et al., 2011      |
| Grass land                                     |                  | yes            | Fry et al., 2011      |
| Agriculture                                    |                  | yes            | Fry et al., 2011      |
| Wetlands                                       |                  | yes            | Fry et al., 2011      |
| <b>Rain (in)</b>                               |                  |                |                       |
| Catchment Mean 24 hour                         |                  | yes            | EnDDaT                |
| Catchment Mean 48 hour                         |                  | yes            | EnDDaT                |
| Catchment Mean 72 hour                         |                  | yes            | EnDDaT                |
| Watershed Mean 24 hour                         |                  | yes            | EnDDaT                |
| Watershed Mean 48 hour                         |                  | yes            | EnDDaT                |
| Watershed Mean 72 hour                         |                  | yes            | EnDDaT                |



**Hydro meteorological data**

|                                               |     |     |                       |
|-----------------------------------------------|-----|-----|-----------------------|
| Daily beach wave height                       | yes |     | Beach sanitary survey |
| Wind speed                                    | yes |     | Beach sanitary survey |
| Wind direction                                | yes |     | Beach sanitary survey |
| Height Above Model Sea Level (m)              |     | yes | GLCFS                 |
| Eastward Water Velocity at Surface (m/s)      |     | yes | GLCFS                 |
| Depth-Averaged Eastward Water Velocity (m/s)  |     | yes | GLCFS                 |
| Northward Water Velocity at Surface (m/s)     |     | yes | GLCFS                 |
| Depth-Averaged Northward Water Velocity (m/s) |     | yes | GLCFS                 |
| Wave Direction (degree)                       |     | yes | GLCFS                 |
| Significant Wave Height (m)                   |     | yes | GLCFS                 |
| Wave Period (S)                               |     | yes | GLCFS                 |
| Eastward Air Velocity (m/s)                   |     | yes | GLCFS                 |
| Northward Air Velocity (m/s)                  |     | yes | GLCFS                 |
| Air Temperature (°C)                          |     | yes | GLCFS                 |
| Cloud Cover (%)                               |     | yes | GLCFS                 |
| Dew Point (°C)                                |     | yes | GLCFS                 |

---

Categorical rankings were expressed as integers (e.g., 1-5); EnDDat (Environmental Data Discovery and Transformation); GLCFS (Great Lakes Coastal Forecasting System)

**TABLE S8** *bontE* gene copy numbers detection and quantification at Bay City

| Date      | <i>bontE</i> gene copies/ml of algae |
|-----------|--------------------------------------|
| 6/14/2012 | 62748                                |
| 6/21/2012 | 193377                               |
| 6/28/2012 | LOD                                  |
| 7/5/2012  | LOD                                  |
| 7/11/2012 | 198559                               |
| 7/19/2012 | 74151                                |
| 7/26/2012 | UND                                  |
| 8/2/2012  | LOD                                  |
| 8/16/2012 | 53121                                |
| 8/30/2012 | 41069                                |
| 9/6/2012  | 74606                                |

LOD: detectable but not quantifiable; UND: undetected

**TABLE S9** Significant correlations between *bontE* detection and environmental parameters.

|                         | <i>bontE</i> in water |                         | <i>bontE</i> in AlgOn |                       | <i>bontE</i> in muck <sup>a</sup> |             | <i>bontE</i> SUB    |             | <i>bontE</i> SOS  |
|-------------------------|-----------------------|-------------------------|-----------------------|-----------------------|-----------------------------------|-------------|---------------------|-------------|-------------------|
| Wind speed              | -0.43<br>0.02<br>30   | <i>bontE</i> in SUB     | 0.47<br>0.03<br>21    | <i>bontE</i> in Water | 0.95<br>0.08<br>4                 | Wind speed  | -0.52<br>0.01<br>23 | Wave height | 0.5<br>0.03<br>19 |
| Mean conductivity       | 0.41<br>0.04<br>26    | Mean water temperature  | 0.29<br>0.01<br>67    | <i>bontE</i> in SED   | -0.8<br>0.08<br>5                 | Wave height | -0.35<br>0.09<br>23 |             |                   |
| Mean salinity           | 0.48<br>0.01<br>25    | Mean salinity           | 0.23<br>0.07<br>63    | Mean TDS              | 0.6<br>0.08<br>9                  | Mussels     | -0.42<br>0.04<br>23 |             |                   |
| Mean turbidity          | -0.49<br>0.01<br>25   | Mean pH                 | 0.3<br>0.01<br>65     | Mean PO <sub>4</sub>  | 0.81<br>0.001<br>9                | Mean pH     | 0.4<br>0.06<br>22   |             |                   |
| Mean NO <sub>3</sub> -N | -0.37<br>0.05<br>27   | Mean NO <sub>3</sub> -N | -0.32<br>0.01<br>68   |                       |                                   |             |                     |             |                   |

Cell content: Correlation coefficient, P value, No. of samples. <sup>a</sup> Muck samples from BC only. AlgOn: algae onshore; SUB: algae submerged in water; SOS: sediment onshore; All *bontE* gene copies are in log scale; except turbidity, mean water temperature, PO<sub>4</sub> and TDS all other parameters are in scored valued ranked from 1-5.

**TABLE S10** *bontE* gene copy numbers detection and quantification at Jeorse Park beach and the rainfall during the sampling period.

| Date      | Time  | Catchment mean rainfall in inches |         |         | <i>bontE</i> gene copies/<br>1 ml algae |
|-----------|-------|-----------------------------------|---------|---------|-----------------------------------------|
|           |       | 24 hour                           | 48 hour | 72 hour |                                         |
| 6/28/2012 | 9:00  | 0                                 | 0       | 0       | 49795                                   |
| 7/12/2012 | 9:00  | 0                                 | 0       | 0       | 43584                                   |
| 7/19/2012 | 9:00  | 1.063                             | 0.545   | 0.363   | UND                                     |
| 7/26/2012 | 9:00  | 0.031                             | 0.025   | 0.137   | UND                                     |
| 7/30/2012 | 9:15  | 0                                 | 0       | 0.014   | 175939                                  |
| 7/31/2012 | 10:00 | 0.424                             | 0.299   | 0.17    | 30517                                   |
| 8/1/2012  | 9:30  | 0                                 | 0.2     | 0.167   | LOD                                     |
| 8/2/2012  | 10:00 | 0                                 | 0       | 0.136   | 69077                                   |
| 8/14/2012 | 9:30  | 0.331                             | 0.257   | 0.171   | 64144                                   |
| 8/15/2012 | 10:00 | 0.03                              | 0.183   | 0.179   | 57525                                   |
| 8/17/2012 | 9:15  | 0.21                              | 0.156   | 0.115   | 84946                                   |
| 8/18/2012 | 9:15  | 0                                 | 0.111   | 0.109   | UND                                     |
| 8/23/2012 | 10:00 | 0                                 | 0       | 0.001   | UND                                     |

LOD: detectable but not quantifiable; UND: undetected

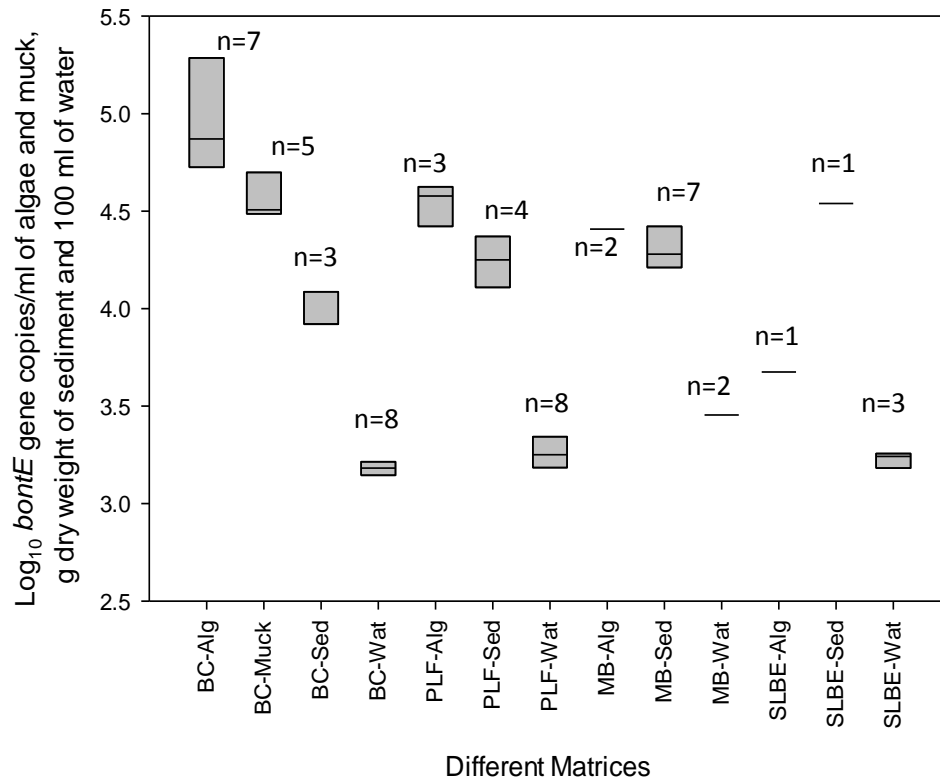

**FIG S1** Distribution of *bontE* in the different matrices at Bay City (BC), Portage (PLF), Maumee Bay (MB) and SLBE. The horizontal line in the grey bars show the median value. Above each bar, the number shows the number of samples which were above the LOQ.

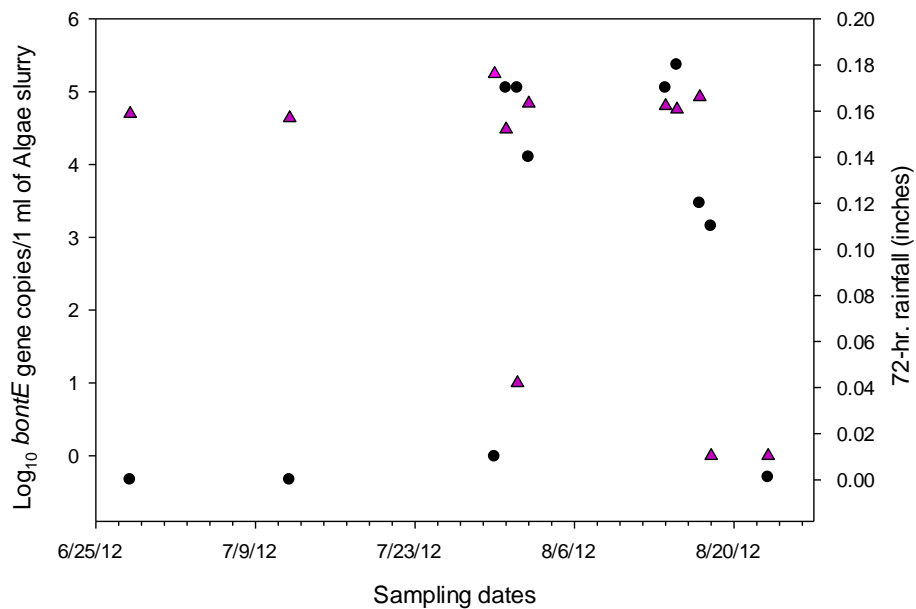

**FIG S2** Temporal variability of *C. botulinum bontE* found at Jeorse Park Recreational Beach. Triangles represent concentration of  $\log_{10}$  *bontE* gene copies found in AlgOn samples and circles represent 72-hr. rainfall in inches.  $\log_{10}=1$  value was assigned to a sample which is detectable but non-quantifiable.  $\log_{10}=0$  values were assigned to two samples which were below limit of detection.

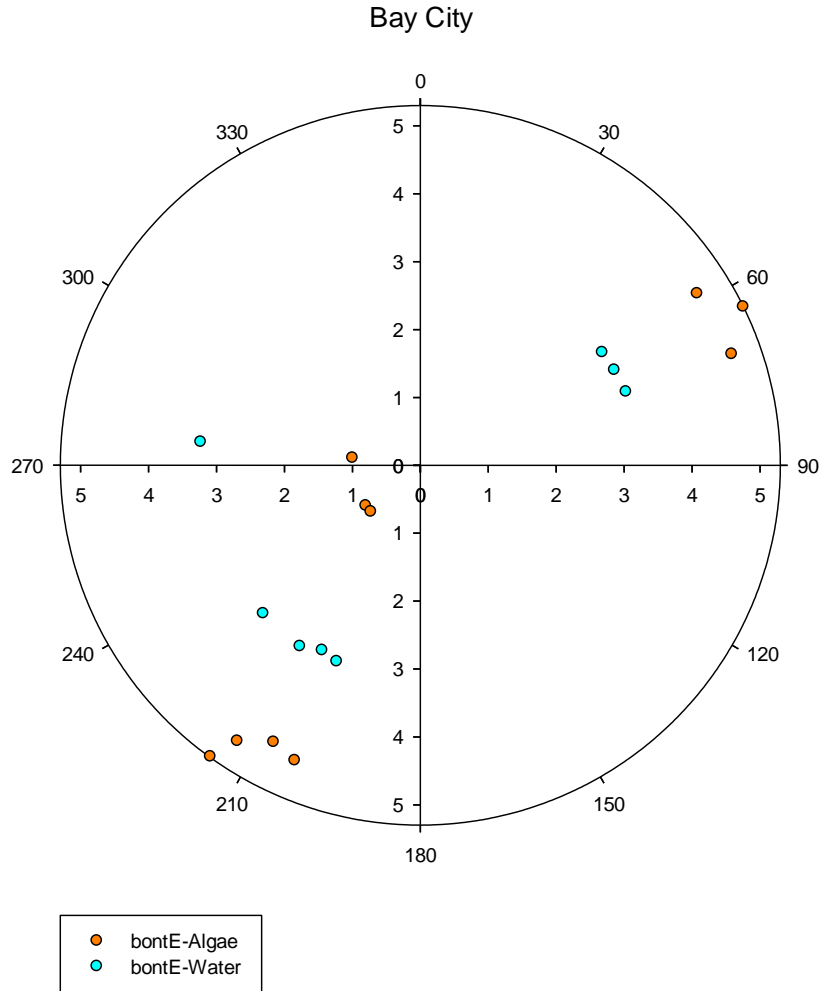

**FIG S3** *bontE* detection vs. wind direction at Bay City during the swimming season. Both y and x axis are *bontE* gene copies in log<sub>10</sub> scale, *bontE* concentration in algae is gene copies/1 ml while that of in water is gene copies/100 ml. Log<sub>10</sub>=1 value was assigned to a sample which is detectable but non-quantifiable.

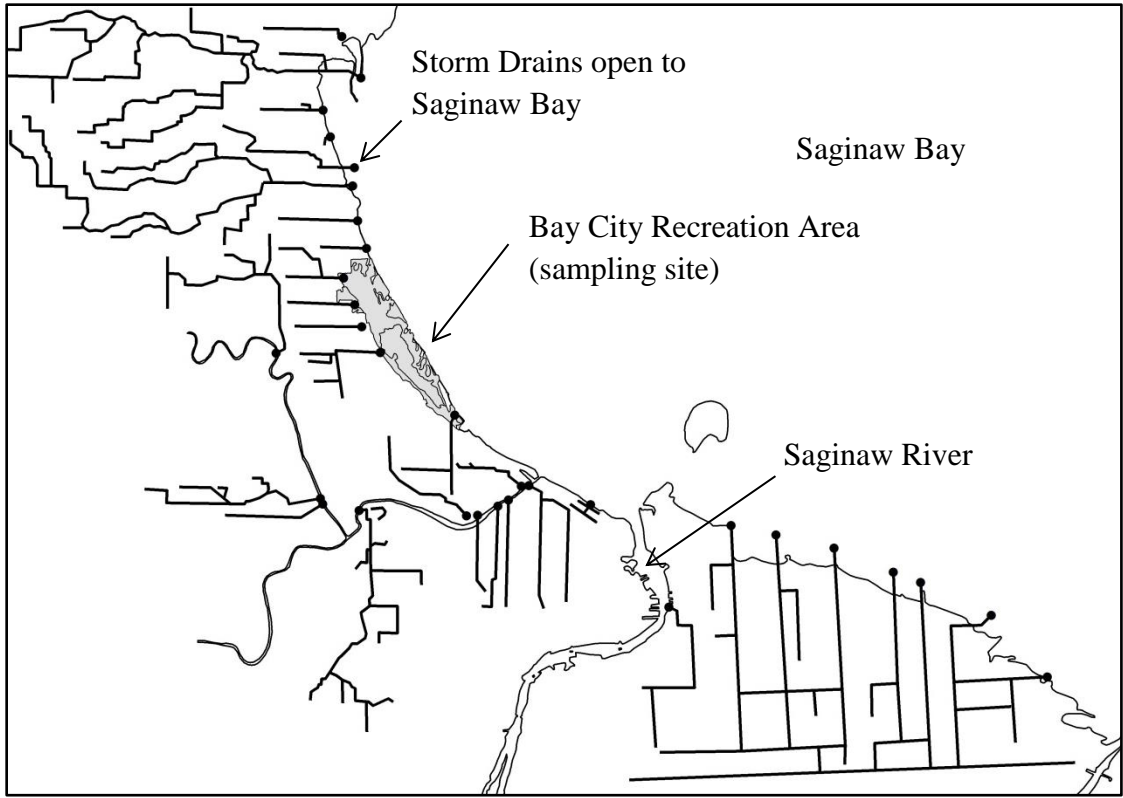

**FIG S4** Locations of storm drains in the Bay City Recreation Area (highlighted in grey) (<http://www.baycounty-mi.gov/DrainCommissioner/>).



## References

1. Beach sanitary survey user manual. 2008. EPA-823-B-06-001.
2. Environmental Data Discovery and Transformation (EnDDaT). 2011. Access and integrate environmental observations for coastal decision support. <http://cida.usgs.gov/enddat/>
3. Fry J, Xian G, Jin S, Dewitz J, Homer C, Yang L, Barnes C, Herold N, Wickham J. 2011. Completion of the 2006 National Land Cover Database for the Conterminous United States, PE&RS. **77**: 858-864.
4. Great Lakes Coastal Forecasting System (GLCFS). <http://www.glerl.noaa.gov/res/glcfs/>
5. Lake Michigan Volunteer AMBLE (Avian Monitoring for Botulism Lakeshore Events) Team. Information for volunteers, beach monitoring protocol, & carcass collecting protocol. 2012. <https://www.nwhc.usgs.gov/amble/files/AMBLE%20-%20Protocols.pdf>
6. U. S. Census Bureau, ESRI Community Analyst. 2010. <http://communityanalyst.esri.com/>
